# Supplementary material for: Information Quality, Reliability, and Engagement of Videos on Congenital Heart Disease: A Cross-Sectional Comparison of YouTube, BiliBili, and Douyin
Source: Research Square preprint supplement (doi:10.21203/rs.3.rs-8202659/v1), 2025-12-30
Supplement: Supplementary file 1 [file 054850c80fc12b0355f6f428.docx]

Table S1 Comparison of YouTube, BiliBili, and Douyin.

| Platforms | Position | functions |
| --- | --- | --- |
| YouTube | YouTube(www.youtube.com) is the second largest social media platform and is increasingly being used by patients as a source of medical information due to its ease of access. | YouTube shorts, YouTube videos and live. |
| BiliBili | BiliBili(www.bilibili.com) is a video platform in China that integrates entertainment and education. It is one of the ways for patients and doctors to understand and learn health-related knowledge. | Video, live, comment, like, forward, danmaku. |
| Douyin | Douyin is TikTok of chinese vision(www.douyin.com), a popular video-sharing social media platform, enables active learning through its short, condensed, and fun nature. | Video, live, comment, like, forward |
