# Supplementary material for: Information Quality, Reliability, and Engagement of Videos on Congenital Heart Disease: A Cross-Sectional Comparison of YouTube, BiliBili, and Douyin
Source: Research Square preprint supplement (doi:10.21203/rs.3.rs-8202659/v1), 2025-12-30
Supplement: Supplementary file 2 [file 38a73225403778a08c2c0f36.docx]

Table S4 Modified DISCERN benchmark criteria.

| Score* | Reliability Score |
| --- | --- |
| 1 score | The video was clear, concise and understandable |
| 1 score | The information sources were reliable |
| 1 score | The information presented was balanced and unbiased |
| 1 score | Additional sources of information were provided for patient reference |
| 1 score | Areas of uncertainty or controversy were appropriately addressed. |

*The criteria of each aspect were scored separately, and 1 point was accumulated when the criteria were reached. A total reliability score ranging from 0 to 5 was obtained.
