# Supplementary material for: Information Quality, Reliability, and Engagement of Videos on Congenital Heart Disease: A Cross-Sectional Comparison of YouTube, BiliBili, and Douyin
Source: Research Square preprint supplement (doi:10.21203/rs.3.rs-8202659/v1), 2025-12-30
Supplement: Supplementary file 3 [file 3dc87de61151b2f990fe575e.docx]

Table S2 Global Quality Score (GQS) benchmark criteria.

| Score | Global Score Description |
| --- | --- |
| 1 score | poor quality, poor traffic, most information missing, not of any use to the patient |
| 2 score | Generally poor quality with poor flow, some information listed but many important topics lacked, of very limited use to patients |
| 3 score | medium quality with suboptimal flow, some of the main information was fully discussed but other information discussed insufficiently, somewhat helpful to patients. |
| 4 score | Good quality and generally goo flow, most of the relevant information is listed, but some topics not covered, useful to patients. |
| 5 score | Excellent quality and excellent flow, very useful for patients |
