# Supplementary material for: Information Quality, Reliability, and Engagement of Videos on Congenital Heart Disease: A Cross-Sectional Comparison of YouTube, BiliBili, and Douyin
Source: Research Square preprint supplement (doi:10.21203/rs.3.rs-8202659/v1), 2025-12-30
Supplement: Supplementary file 4 [file c275351548535ce6d7ebd4f7.docx]

Table S3 Journal of the American Medical Association (JAMA) benchmark criteria.

| Score* | Score component | |
| --- | --- | --- |
| 1 score | Authorship | Provided authorship information |
| 1 score | Attribution | Listed copyright information and references/sources |
| 1 score | Currency | Included the initial date and subsequent updates |
| 1 score | Disclosure | Disclosed any potential conflicts of interest, funding, sponsorship, advertising support or video ownership |

*The criteria of each aspect were scored separately, and 1 point was accumulated when the criteria were reached. A total reliability score ranging from 0 to 5 was obtained.
